# Supplementary material for: The effects of the novel A53E alpha-synuclein mutation on its oligomerization and aggregation
Source: PubMed Central journal article supplement (PMC5148884; doi:10.1186/s40478-016-0402-8), 2016-12-09

### S1.1

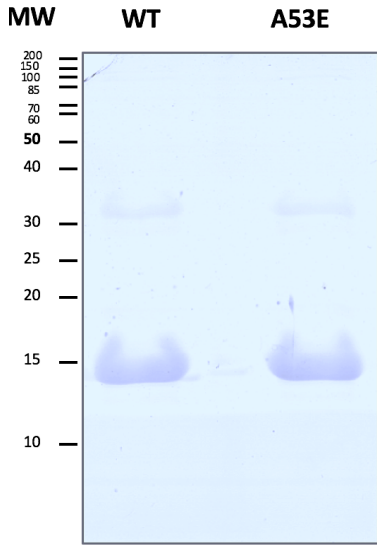

### S1.2

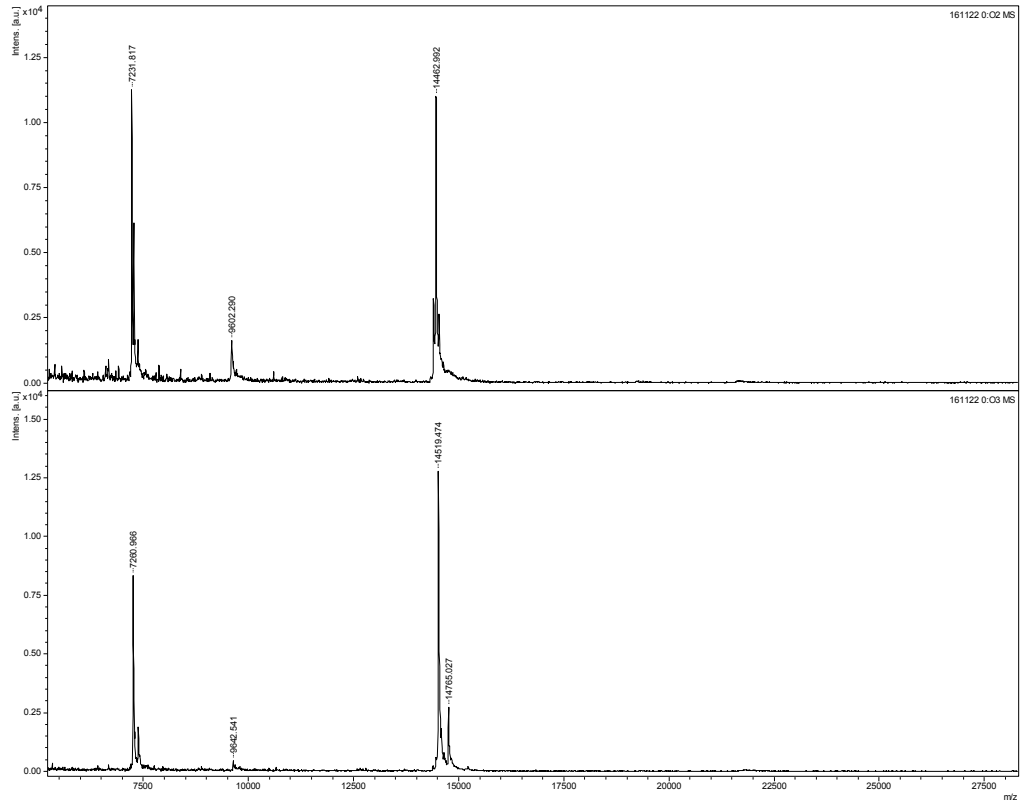

### S2.1

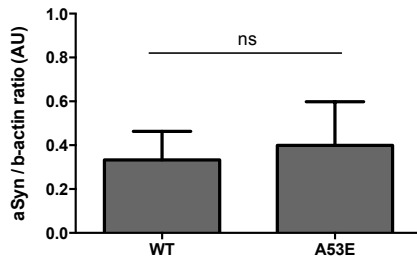

### S2.2

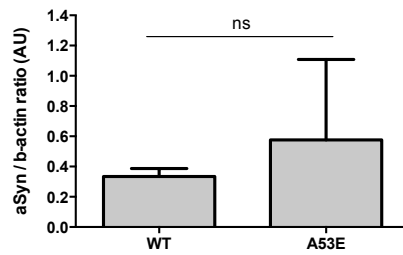

### S3.1

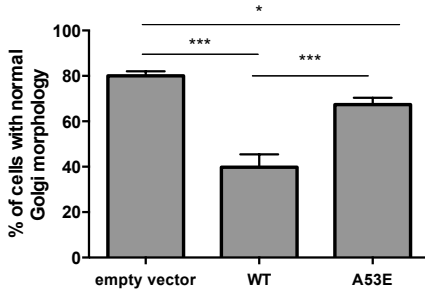

### S3.2

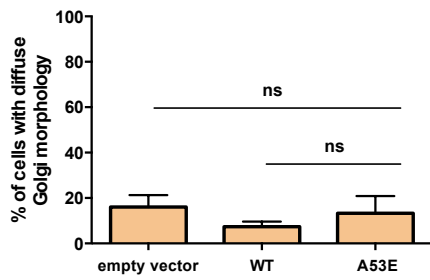

### S3.3

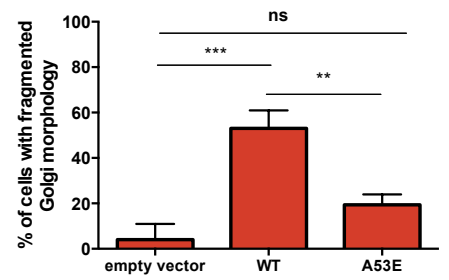

### S3.4

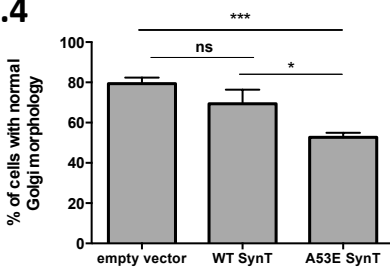

### S3.5

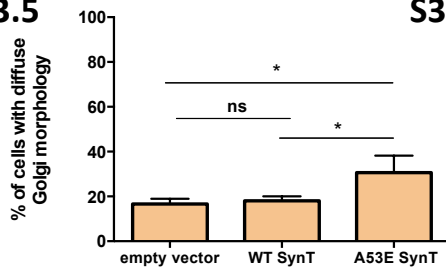

### S3.6

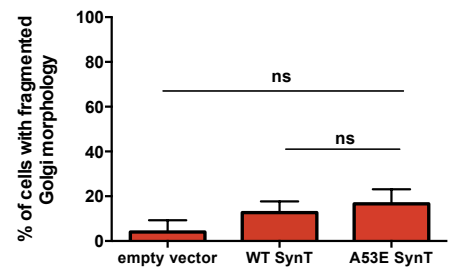

Supplement: 40478_2016_402_MOESM1_ESM.pdf [file 40478_2016_402_MOESM1_ESM.pdf]
